# Supplementary material for: Development of a Food-Based Diet Quality Score from a Short FFQ and Associations with Obesity Measures, Eating Styles and Nutrient Intakes in Finnish Twins
Source: MDPI journal article supplement (doi:10.3390/nu11112561), 2019-10-23
Supplement: s1 [file s1]

**Supplementary Table S1. Questions and answer categories for eating styles**

| EATING STYLE                         | QUESTIONS                                                                                                                                                                                                                                                                                                                                                                                                                                                                                                                                                                                                                                                                               |
|--------------------------------------|-----------------------------------------------------------------------------------------------------------------------------------------------------------------------------------------------------------------------------------------------------------------------------------------------------------------------------------------------------------------------------------------------------------------------------------------------------------------------------------------------------------------------------------------------------------------------------------------------------------------------------------------------------------------------------------------|
| <b>Meal frequency</b>                | <p>How often do you eat breakfast? (Sandwiches, porridge, yoghurt or something similar)</p> <ul style="list-style-type: none"> <li>- Every morning</li> <li>- 5 to 6 times a week</li> <li>- 2 to 4 times a week</li> <li>- Once a week or less frequent</li> </ul> <p>How often in a day do you usually eat? (Take also the snacks into account)</p> <ul style="list-style-type: none"> <li>- 1 to 2 times</li> <li>- 3 to 4 times</li> <li>- 5 to 6 times</li> <li>- 7 times or more often</li> </ul>                                                                                                                                                                                 |
| <b>Regular eating</b>                | <p>Which of the alternatives mentioned below describes best the regularity of your eating habits? (Regularity of your eating habits)</p> <ul style="list-style-type: none"> <li>- I eat very regularly</li> <li>- I eat quite regularly</li> <li>- I eat quite irregularly</li> <li>- I eat very irregularly</li> </ul> <p>Which of the alternatives mentioned below describes you best? (Restrictive/overeating style)</p> <ul style="list-style-type: none"> <li>- It is easy for me to eat pretty as much I need</li> <li>- Quite often I eat more than needed</li> <li>- I often try to restrict my eating</li> <li>- Sometimes I'm on a strict diet, at other I overeat</li> </ul> |
| <b>Health-conscious eating style</b> | <p>I tend to eat healthily (Usually to Seldom)</p> <p>I avoid greasy meals (Usually to Seldom)</p> <p>I avoid calories (Usually to Seldom)</p>                                                                                                                                                                                                                                                                                                                                                                                                                                                                                                                                          |
| <b>Night eating style</b>            | <p>At nights I wake up to eat (Usually to Seldom)</p>                                                                                                                                                                                                                                                                                                                                                                                                                                                                                                                                                                                                                                   |
| <b>External eating style</b>         | <p>I eat tempted to the advertisements (Usually to Seldom)</p>                                                                                                                                                                                                                                                                                                                                                                                                                                                                                                                                                                                                                          |
| <b>Emotional eating style</b>        | <p>I reward myself with good food (Usually to Seldom)</p> <p>I console myself by eating or drinking (Usually to Seldom)</p>                                                                                                                                                                                                                                                                                                                                                                                                                                                                                                                                                             |
| <b>Snacking eating style</b>         | <p>During meal times I eat sufficiently – I don't need to snack between meals (Usually to Seldom)</p> <p>I replace my meals with snacks (Usually to Seldom)</p> <p>I eat most in the evenings (Usually to Seldom)</p> <p>My food consumption is highest in the evening (Usually to Seldom)</p> <p>While I am eating, I watch TV (Usually to Seldom)</p>                                                                                                                                                                                                                                                                                                                                 |
